# Supplementary material for: Pressure-induced bandgap engineering of lead-free halide double perovskite (NH4)2SnBr6
Source: Royal Society of Chemistry journal article supplement (doi:10.1039/d1cp03267d), 2021-01-01
Supplement: d1cp03267d1.pdf [file d1cp03267d1.pdf]

## Supporting Information

### Pressure-Induced Bandgap Engineering of Lead-Free Halide Double

#### Perovskite $(\text{NH}_4)_2\text{SnBr}_6$

Jiaxiang Wang,<sup>a</sup> Lingrui Wang,<sup>\*,a</sup> Fei Wang,<sup>\*,a,b</sup> Sheng Jiang<sup>c</sup> and Haizhong Guo<sup>a,d</sup>

<sup>a</sup> Key Laboratory of Material Physics, Ministry of Education, and <sup>b</sup> International Laboratory for Quantum Functional Materials of Henan School of Physics and Microelectronics, Zhengzhou University, Zhengzhou 450001, China.

<sup>c</sup> Shanghai Advanced Research Institute, Chinese Academy of Sciences, Shanghai 201210, China.

<sup>d</sup> Collaborative Innovation Center of Light Manipulations and Applications, Shandong Normal University, Jinan, Shandong 250358, China

#### Experimental Section

**Sample Preparation and High Pressure Generation.**  $(\text{NH}_4)_2\text{SnBr}_6$  was prepared by combining 39.17 mg of  $\text{NH}_4\text{Br}$  (0.4 mmol, Macklin, 99%) and 87.66 mg of  $\text{SnBr}_4$  (0.2 mmol, Alfa Aesar, 99%) in 1 mL of 57% (w/w) HBr, which was stirred for 30 min.<sup>1</sup> The resulted pale yellow powder was washed three times with hydrobromic acid and vacuum-dried overnight. High pressure experiments are carried out using a symmetric diamond anvil cell (DAC) with static pressure in the sample chamber to ensure equal pressure was applied to each crystal direction of the particle.. The culet diameter of the diamond anvils was 400  $\mu\text{m}$ . The sample was loaded into a 150  $\mu\text{m}$  diameter hole of the T301 steel gasket, which was preindented to a thickness of 40  $\mu\text{m}$ . A small ruby chip was inserted into the sample compartment for in situ pressure calibration, utilizing the R1 ruby fluorescence method. Silicon oil was utilized as the pressure transmitting medium (PTM) for optical absorption and XRD experiments, while the argon and KBr were employed as PTM for Raman and IR measurements, respectively. All of the experiments were performed at room temperature.

**In situ High Pressure Measurements.** High pressure angle-dispersive X-ray diffraction (ADXRD) experiments with a wavelength of 0.6199 Å beam were carried out at BL15U1, Shanghai Synchrotron Radiation Facility (SSRF), China.  $\text{CeO}_2$  was used as the standard sample to do the calibration. The collected two-dimensional images were integrated on the basis of FIT2D program, yielding one-dimensional intensity versus diffraction angle 2-theta patterns. Refinements of the XRD patterns were accomplished by using the Reflex module in Materials Studio program. High-pressure absorption spectra (250-1000 nm) were measured in the exciton absorption band region by a deuterium-halogen light source and recorded with an optical fiber spectrometer (Ocean Optics, QE65000). The transmission spectrum of silicon oil around the sample was subtracted as the background. High-pressure Raman spectra were recorded using a spectrometer equipped with liquid nitrogen cooled CCD (iHR 550, Symphony II, Horiba Jobin Yvon). A 532 nm single-mode DPSS laser was utilized to excite the sample, and the output power was 10 mW. The resolution of the system was 1  $\text{cm}^{-1}$ . High pressure IR spectra measurements were conducted using a Nicolet iN10 FT-IR micro-spectrometer.

**Computational Methodology.** The first-principles calculations based on density functional theory (DFT) were performed using the plane-wave pseudopotential as implemented in the Vienna Ab-initio Simulation Package

(VASP).<sup>2,3</sup> The electron–core interactions were described with the frozen-core projector-augmented wave pseudopotentials.<sup>4</sup> The generalized gradient approximation formulated by Perdew, Burke, and Ernzerhof (PBE) as the exchange correlation functional with cutoff energies of 520 eV was chosen in all of our calculations.<sup>5</sup> A reciprocal space sampling with a 6×6×6 and 8×8×6 k-points is set in the Brillouin zone for cubic and tetragonal phase. The total energy convergence criteria of 1.0×10<sup>-5</sup> eV and the force on each atom converge to 0.01 eV Å<sup>-1</sup> in optimizing the geometric structure. The vdW interaction is considered by using the DFT-D2 method of Grimme.<sup>6</sup> The DFT PBE method are used to obtain total energy and pressure trend. The Heyd-Scuseria-Ernzerhof (HSE06) method is used to get the bandgap values and electronic structure.<sup>7</sup> Pressure was modeled with a fixing volume and shape of the crystal while allowing all lattice constants and atomic positions to relax. The internal pressure values were calculated through the

relation:  $p = -\frac{\partial E}{\partial V}$ , where E is the total energy and V is the cell volume of the crystal, respectively.

|                          | 1 atm        | 6.3 GPa    |
|--------------------------|--------------|------------|
| temperature/K            | 293(2)       | 293(2)     |
| crystal system           | cubic        | tetragonal |
| space group              | <i>Fm-3m</i> | <i>P42</i> |
| <i>a</i> / Å             | 10.6046      | 6.9765     |
| <i>b</i> / Å             | 10.6046      | 6.9765     |
| <i>c</i> / Å             | 10.6046      | 10.0451    |
| $\alpha=\beta=\gamma$ /° | 90           | 90         |
| Volume/ Å <sup>3</sup>   | 1192.58      | 488.91     |
| $\theta$ range /°        | 5-21         | 5.2-20.9   |
| Wavelength / Å           | 0.6199       | 0.6199     |
| $R_{wp}$ / %             | 1.26         | 1.52       |
| $R_p$ / %                | 0.69         | 1.01       |

**Figure S1.** Refinement lattice parameters and refinement statistics at ambient pressure and 6.3 GPa for (NH<sub>4</sub>)<sub>2</sub>SnBr<sub>6</sub> crystal.

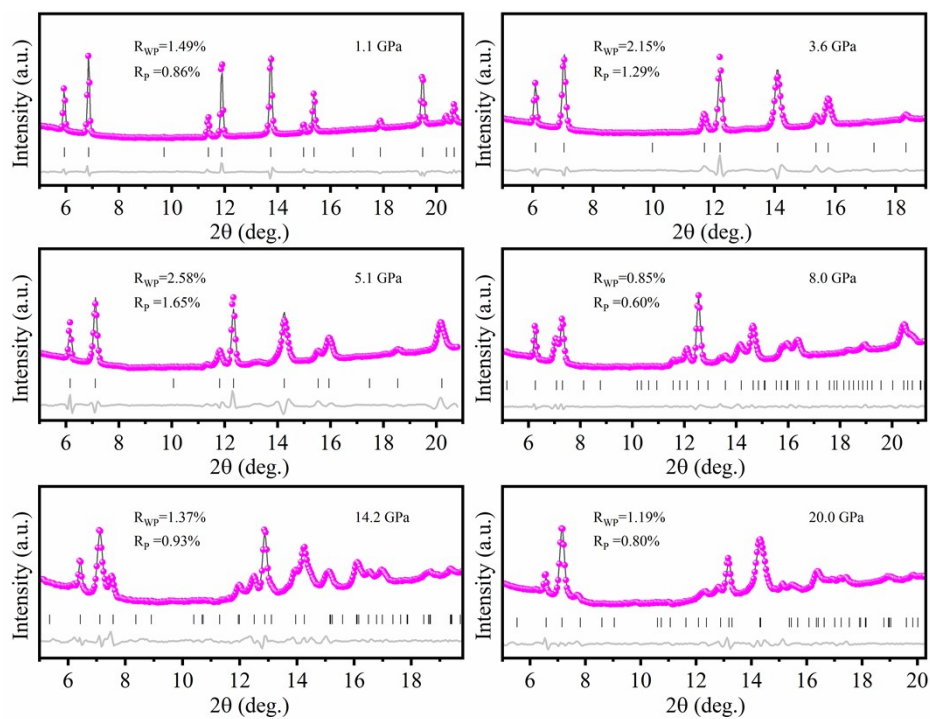

**Figure S2.** Rietveld refinements of  $(\text{NH}_4)_2\text{SnBr}_6$  at different pressures.

|                                   | Pressur     |         |         |         |                     |
|-----------------------------------|-------------|---------|---------|---------|---------------------|
|                                   | e           | a (Å)   | b (Å)   | c (Å)   | V (Å <sup>3</sup> ) |
|                                   | (GPa)       |         |         |         |                     |
| <b>Cubic</b><br><i>(Fm-3m)</i>    | <b>0</b>    | 10.6046 | 10.6046 | 10.6046 | 1192.58             |
|                                   | <b>0.4</b>  | 10.4908 | 10.4908 | 10.4908 | 1154.57             |
|                                   | <b>1.1</b>  | 10.3641 | 10.3641 | 10.3641 | 1113.26             |
|                                   | <b>1.8</b>  | 10.2809 | 10.2809 | 10.2809 | 1086.65             |
|                                   | <b>2.6</b>  | 10.1947 | 10.1947 | 10.1947 | 1059.55             |
|                                   | <b>3.6</b>  | 10.1040 | 10.1040 | 10.1040 | 1031.52             |
|                                   | <b>4.0</b>  | 10.0864 | 10.0864 | 10.0864 | 1026.15             |
|                                   | <b>5.1</b>  | 9.9949  | 9.9949  | 9.9949  | 998.47              |
| <b>Tetragonal</b><br><i>(P42)</i> | <b>6.3</b>  | 6.9765  | 6.9765  | 10.0451 | 488.91              |
|                                   | <b>6.6</b>  | 6.9535  | 6.9535  | 10.0395 | 485.42              |
|                                   | <b>8.0</b>  | 6.8745  | 6.8745  | 10.0371 | 474.34              |
|                                   | <b>10.7</b> | 6.7730  | 6.7730  | 10.0196 | 459.63              |
|                                   | <b>12.1</b> | 6.7213  | 6.7213  | 10.0052 | 451.99              |
|                                   | <b>14.2</b> | 6.6364  | 6.6364  | 9.9907  | 440.00              |
|                                   | <b>16.4</b> | 6.5744  | 6.5744  | 9.9838  | 431.52              |
|                                   | <b>17.8</b> | 6.5132  | 6.5132  | 9.9700  | 422.94              |
|                                   | <b>20.0</b> | 6.4313  | 6.4313  | 9.9385  | 411.07              |

**Figure S3.** The lattice parameters and unit cell volume of (NH<sub>4</sub>)<sub>2</sub>SnBr<sub>6</sub> at different pressures.

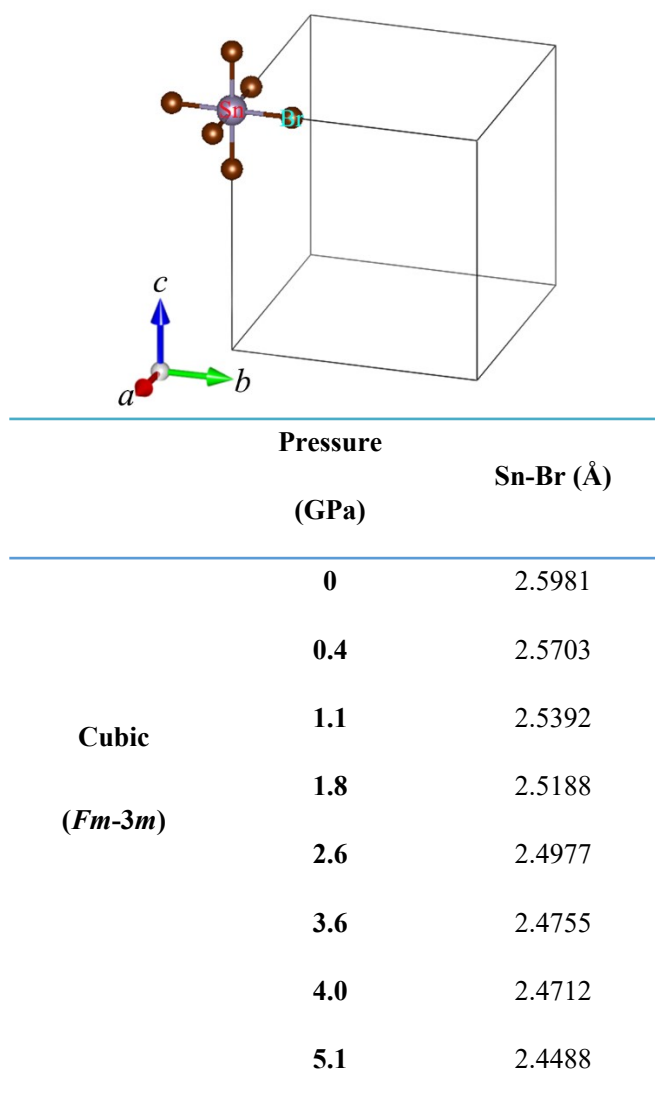

**Figure S4.** Refined Sn-Br bond distance of  $(\text{NH}_4)_2\text{SnBr}_6$  before phase transition.

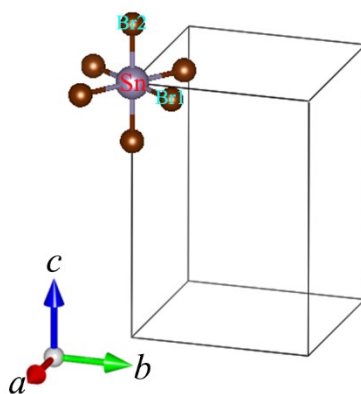

|                                              | Pressure<br>(GPa) | Sn-Br1 (Å) | Sn-Br2 (Å) |
|----------------------------------------------|-------------------|------------|------------|
| <b>Tetragonal</b><br><br><b>(<i>P4</i>2)</b> | <b>6.3</b>        | 2.4427     | 2.3054     |
|                                              | <b>6.6</b>        | 2.4346     | 2.3041     |
|                                              | <b>8.0</b>        | 2.4070     | 2.3035     |
|                                              | <b>10.7</b>       | 2.3715     | 2.2995     |
|                                              | <b>12.1</b>       | 2.3533     | 2.2962     |
|                                              | <b>14.2</b>       | 2.3236     | 2.2929     |
|                                              | <b>16.4</b>       | 2.3019     | 2.2913     |
|                                              | <b>17.8</b>       | 2.2805     | 2.2881     |
|                                              | <b>20.0</b>       | 2.2518     | 2.2809     |

**Figure S5.** Refined Sn-Br bond distance of  $(\text{NH}_4)_2\text{SnBr}_6$  after phase transition.

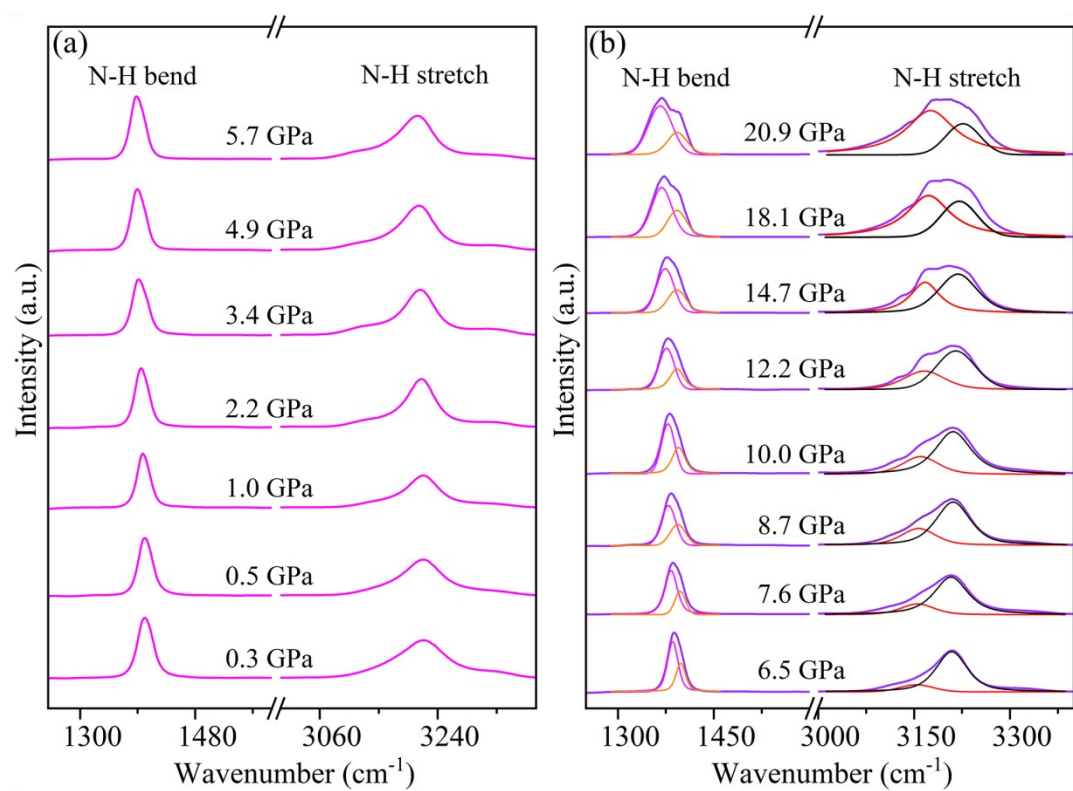

**Figure S6.** IR spectra of  $(\text{NH}_4)_2\text{SnBr}_6$  at different pressures.

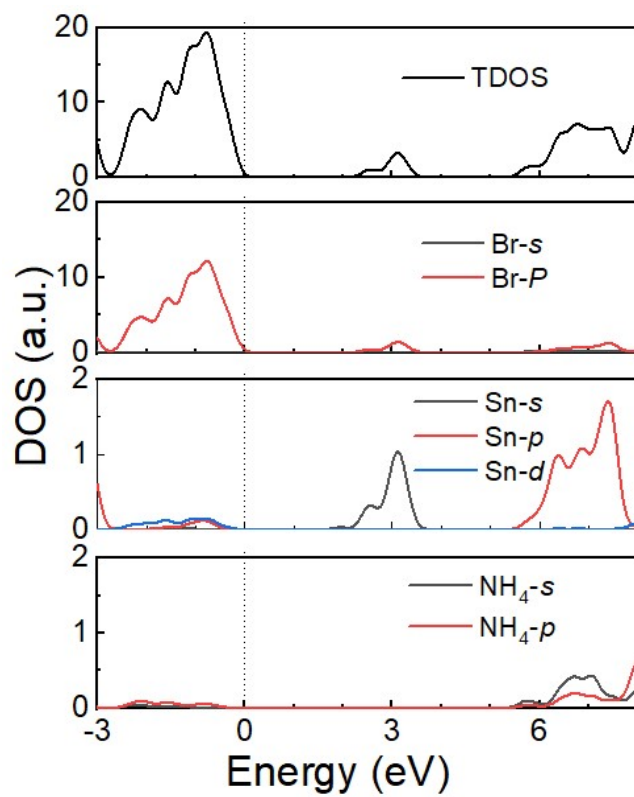

**Figure S7.** Calculated electronic band structures and projected density of states for  $(\text{NH}_4)_2\text{SnBr}_6$ .

## References

1. R. L. Armstrong, R. M. Morra, B. M. Powell and W. J. L. Buyers, *Can. J. Phys.*, 1983, **61**, 997-1002.
2. G. Kresse and J. Furthmüller, *Comp. Mater. Sci.*, 1996, **6**, 15-50.
3. G. Kresse and J. Furthmüller, *Phys. Rev. B*, 1996, **54**, 11169-11186.
4. P. E. Blöchl, *Phys. Rev. B*, 1994, **50**, 17953-17979.
5. J. P. Perdew, K. Burke and M. Ernzerhof, *Phys. Rev. Lett.*, 1996, **77**, 3865-3868.
6. S. Grimme, *J. Comput. Chem.*, 2006, **27**, 1787-1799.
7. A. V. Krukau, O. A. Vydrov, A. F. Izmaylov and G. E. Scuseria, *J. Chem. Phys.*, 2006, **125**, 224106.
